# Supplementary material for: Zeolite Encapsulated Nanocrystalline CuO: A Redox Catalyst for the Oxidation of Secondary Alcohols
Source: Hindawi journal article supplement (doi:10.1155/2008/257691), 2008-01-01
Supplement: f1 [file 257691.f1.pdf]

## Supplementary Figure

### Zeolite encapsulated nanocrystalline CuO: A redox catalyst for the oxidation of secondary alcohols

Sakthivel Vijaikumar, Thirumeni Subramanian, and Kasi Pitchumani\*

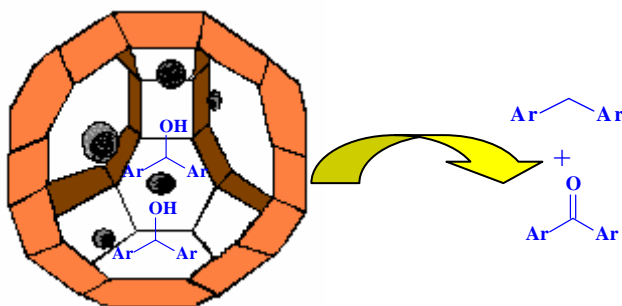

Zeolite encapsulated nano-CuO.
